# Supplementary material for: Vaping for weight control: A cross-sectional population study in England
Source: PubMed Central journal article supplement (PMC6555398; doi:10.1016/j.addbeh.2019.04.007), 2019-08
Supplement: mmc1.pdf [file mmc1.pdf]

**Supplementary Table** Bayes factors for non-significant results

|                                                                     | <b>BF 2.0</b> | <b>Interpretation of BF based on 2.0</b>  | <b>BF 0.5</b> | <b>Interpretation of BF based on 0.5</b>  |
|---------------------------------------------------------------------|---------------|-------------------------------------------|---------------|-------------------------------------------|
| <b>Smoking for weight control</b>                                   |               |                                           |               |                                           |
| Age 25-34                                                           | 0.84          | Data are insensitive                      | 0.40          | Data are insensitive                      |
| Age 35-44                                                           | 1.00          | Data are insensitive                      | 0.26          | Moderate evidence for the null hypothesis |
| Age 65+                                                             | 0.95          | Data are insensitive                      | 0.39          | Data are insensitive                      |
| Non-white                                                           | 0.19          | Moderate evidence for the null hypothesis | 1.04          | Data are insensitive                      |
| C2DE                                                                | 0.53          | Data are insensitive                      | 0.22          | Moderate evidence for the null hypothesis |
| Tried to quit in past year                                          | 1.11          | Data are insensitive                      | 0.09          | Strong evidence for the null hypothesis   |
| <b>Heard weight control claim</b>                                   |               |                                           |               |                                           |
| Age 25-34                                                           | 0.13          | Moderate evidence for the null hypothesis | 0.90          | Data are insensitive                      |
| Age 35-44                                                           | 0.08          | Strong evidence for the null hypothesis   | 1.20          | Data are insensitive                      |
| Non-white                                                           | 0.14          | Moderate evidence for the null hypothesis | 0.99          | Data are insensitive                      |
| C2DE                                                                | 0.06          | Strong evidence for the null hypothesis   | 1.21          | Data are insensitive                      |
| Tried to quit in past year                                          | 0.24          | Moderate evidence for the null hypothesis | 0.42          | Data are insensitive                      |
| Quit in past year                                                   | 0.82          | Data are insensitive                      | 0.88          | Data are insensitive                      |
| <b>Believe weight control claim</b>                                 |               |                                           |               |                                           |
| Age 25-34                                                           | 0.16          | Moderate evidence for the null hypothesis | 0.99          | Data are insensitive                      |
| Age 35-44                                                           | 0.41          | Data are insensitive                      | 0.53          | Data are insensitive                      |
| Age 45-54                                                           | 0.17          | Moderate evidence for the null hypothesis | 1.01          | Data are insensitive                      |
| Age 55-64                                                           | 0.06          | Strong evidence for the null hypothesis   | 1.11          | Data are insensitive                      |
| Age 65+                                                             | 0.25          | Moderate evidence for the null hypothesis | 0.96          | Data are insensitive                      |
| Non-white                                                           | 0.54          | Data are insensitive                      | 0.39          | Data are insensitive                      |
| C2DE                                                                | 0.93          | Data are insensitive                      | 0.11          | Moderate evidence for the null hypothesis |
| Quit in past year                                                   | 0.05          | Strong evidence for the null hypothesis   | 1.02          | Data are insensitive                      |
| <b>Weight control would increase likelihood of e-cigarette use</b>  |               |                                           |               |                                           |
| Female                                                              | 1.01          | Data are insensitive                      | 0.07          | Strong evidence for the null hypothesis   |
| Age 25-34                                                           | 0.64          | Data are insensitive                      | 0.24          | Moderate evidence for the null hypothesis |
| Age 35-44                                                           | 0.19          | Moderate evidence for the null hypothesis | 0.87          | Data are insensitive                      |
| Age 45-54                                                           | 0.66          | Data are insensitive                      | 0.27          | Moderate evidence for the null hypothesis |
| Age 55-64                                                           | 0.54          | Data are insensitive                      | 0.42          | Data are insensitive                      |
| Non-white                                                           | 0.20          | Moderate evidence for the null hypothesis | 0.80          | Data are insensitive                      |
| C2DE                                                                | 1.40          | Data are insensitive                      | 0.05          | Strong evidence for the null hypothesis   |
| <b>Weight control would increase likelihood of stopping smoking</b> |               |                                           |               |                                           |
| Female                                                              | 0.77          | Data are insensitive                      | 0.10          | Moderate evidence for the null hypothesis |
| Age 25-34                                                           | 1.33          | Data are insensitive                      | 0.05          | Strong evidence for the null hypothesis   |
| Age 35-44                                                           | 1.07          | Data are insensitive                      | 0.13          | Moderate evidence for the null hypothesis |
| Age 55-64                                                           | 0.85          | Data are insensitive                      | 0.29          | Moderate evidence for the null hypothesis |
| Age 65+                                                             | 0.35          | Data are insensitive                      | 0.85          | Data are insensitive                      |
| Non-white                                                           | 0.29          | Moderate evidence for the null hypothesis | 0.60          | Data are insensitive                      |

BF 2.0 = Bayes factor based on an expected effect size of OR=2.0. BF 0.5 = Bayes factor based on an expected effect size of OR=0.5. Bayes factors between 1/30 and 1/10 indicate strong evidence for the null hypothesis, between 1/10 and 1/3 indicate moderate evidence for the null hypothesis, and between 1/3 and 3 indicate that the data are insensitive (based on Jeffreys' Bayes factor cut-offs (21,24)).
